# Supplementary material for: Construction of polyimide structures containing iron(ii) clathrochelate intercalators: promising materials for CO2 gas uptake and salient adsorbents of iodine from gaseous and liquid phases
Source: Royal Society of Chemistry journal article supplement (doi:10.1039/d4ta02194k), 2024-01-01
Supplement: d4ta02194k1.pdf [file d4ta02194k1.pdf]

## Supporting Information

### **Construction of Polyimide Structures Containing Iron(II) Clathrochelate Intercalators: Promising Materials for CO<sub>2</sub> Gas Uptake and Salient Adsorbents of Iodine from the Gaseous and Liquid Phases**

Suchetha Shetty,<sup>1,2</sup> Noorullah Baig,<sup>1,2</sup> Mikhael Bechelany,<sup>3</sup> and Bassam Alameddine<sup>\*1,2</sup>

<sup>1</sup> Department of Mathematics and Natural Sciences, Gulf University for Science and Technology, Mubarak Al-Abdullah, Hawally 32093, Kuwait

<sup>2</sup> Functional Materials Group, Gulf University for Science and Technology, Mubarak Al-Abdullah, Hawally32093, Kuwait

<sup>3</sup> Institut Européen des Membranes, IEM, UMR 5635, Univ Montpellier, ENSCM, Centre national de la recherche scientifique (CNRS), Place Eugène Bataillon, 34095 Montpellier, France

Tel: +965 2530 7111.

E-mail address: [alameddine.b@gust.edu.kw](mailto:alameddine.b@gust.edu.kw)

## Contents

|                                                                                             |                  |
|---------------------------------------------------------------------------------------------|------------------|
| Synthesis of <b>DAC</b>                                                                     | (i)              |
| <sup>1</sup> H-NMR spectrum of <b>DAC</b>                                                   | Figure S1        |
| <sup>13</sup> C-NMR spectrum of <b>DAC</b> and <b>ACP2,3</b>                                | Figures S2-S4    |
| FTIR spectrum of <b>DAC</b> and <b>ACP2,3</b>                                               | Figures S5-S7    |
| EI-MS spectrum of <b>DAC</b>                                                                | Figure S8        |
| XPS spectrum of <b>DAC</b> and <b>ACP2,3</b>                                                | Figures S9-S11   |
| TGA thermograms of <b>ACP1-3</b>                                                            | Figure S12       |
| TGA thermograms of <b>ACP1-3@I<sub>2</sub></b>                                              | Figure S13       |
| Kinetic studies of <b>ACP1,2@I<sub>2</sub></b>                                              | Figures S14, S15 |
| N <sub>2</sub> adsorption and desorption isotherms for <b>ACP1</b> recorded at 77 K         | Figure S16       |
| Suggested CO <sub>2</sub> adsorption mechanism by <b>ACP3</b>                               | Figure S17       |
| Suggested I <sub>2</sub> adsorption mechanism by <b>ACP3</b>                                | Figure S18       |
| Comparison of CO <sub>2</sub> and I <sub>2</sub> capture capacity with different adsorbents | Tables S1, S2    |

(i) **Synthesis of DAC**

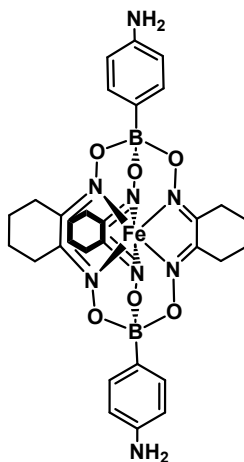

To a stirring degassed solution of 4-Aminophenylboronic acid pinacol ester (1 g, 4.56 mmol, 1 eq.) in methanol (40 mL), 1,2-cyclohexanedione dioxime (0.84 g, 5.93 mmol, 1.3 eq.) and iron(II) chloride (0.26 g, 2.05 mmol, 0.45 eq.) were added under argon and the reaction mixture was allowed to reflux for 24h. The solvent was concentrated and the red solid was precipitated from petroleum ether. The precipitate was filtered and washed thoroughly with water, petroleum ether and diethyl ether then allowed to dry under vacuum affording the desired product as a red color solid (1.38 g, 99%). <sup>1</sup>H-NMR (400 MHz, DMSO-D<sub>6</sub>, ppm): δ 9.89 (s, 4H, -NH<sub>2</sub>), 7.66-7.63 (d, 4H, J=12 Hz, ArH), 7.27-7.25 (d, 4H, J = 8 Hz, ArH) 2.85 (s, 12H, -CH<sub>2</sub>), 1.76 (s, 12H, -CH<sub>2</sub>). <sup>13</sup>C-NMR (100 MHz, DMSO-D<sub>6</sub>, ppm): δ 168.68, 145.11, 134.15, 123.20, 109.98, 26.58 and 21.11. EI-HRMS: m/z calculated for M<sup>+</sup> C<sub>30</sub>H<sub>36</sub>B<sub>2</sub>FeN<sub>8</sub>O<sub>6</sub> 682.2288 found 682.3.

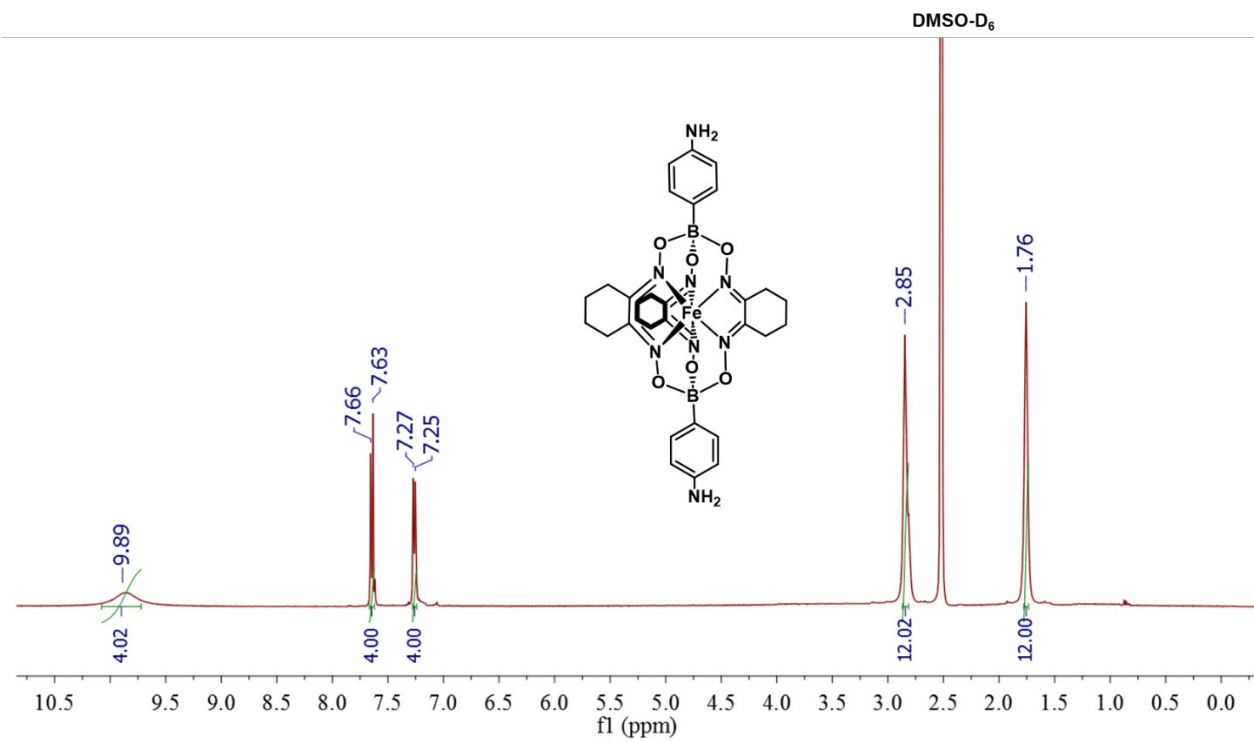

**Figure S1** <sup>1</sup>H-NMR spectrum of DAC

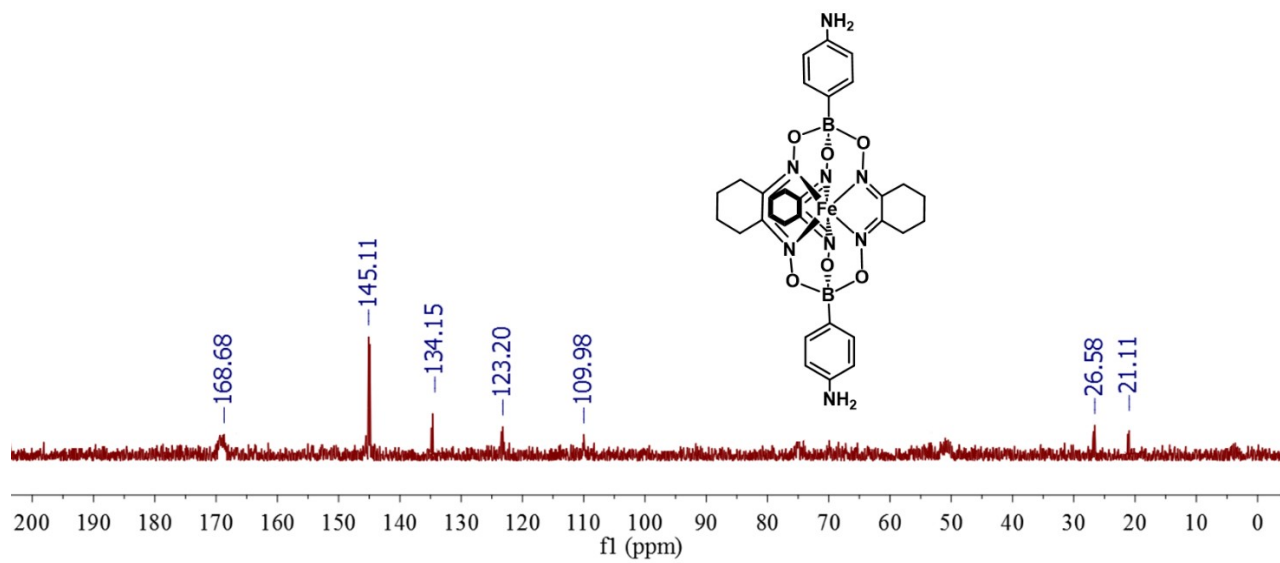

**Figure S2**  $^{13}\text{C}$ -NMR spectrum of **DAC** in  $\text{DMSO-D}_6$

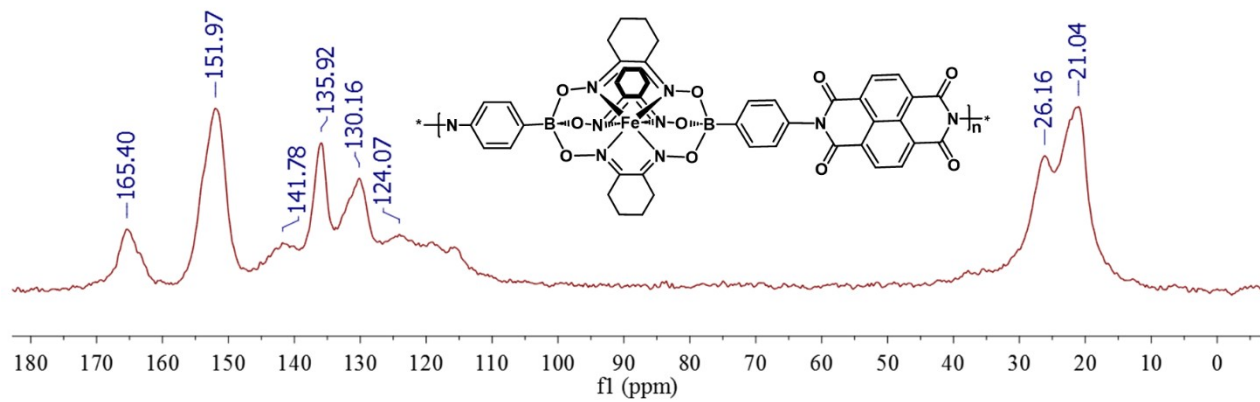

**Figure S3** Solid state  $^{13}\text{C}$ -NMR spectrum **ACP2**

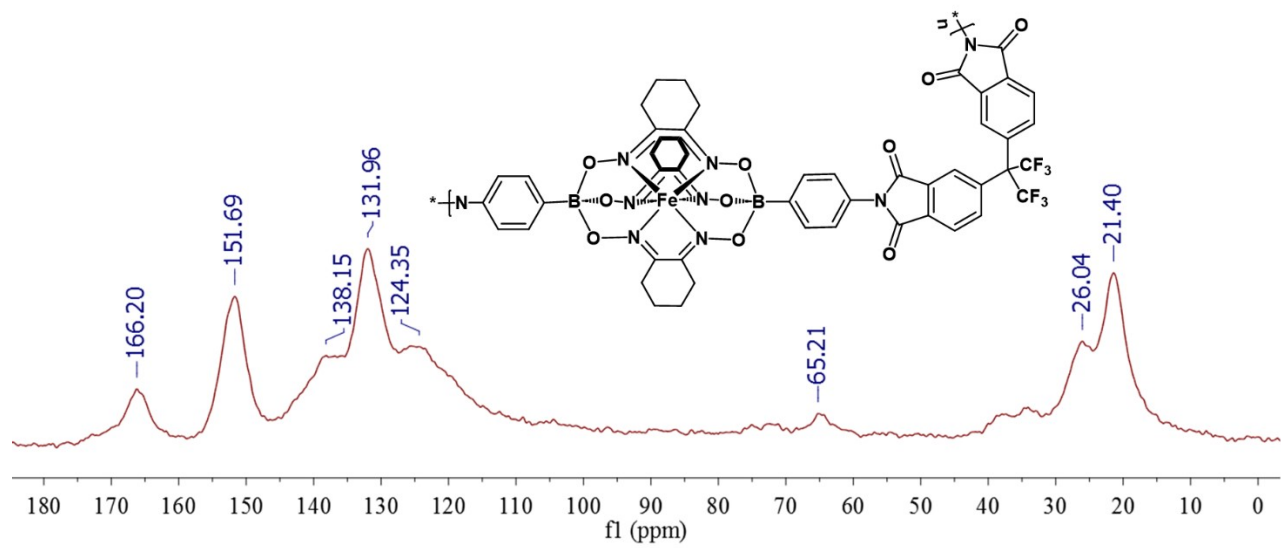

**Figure S4** Solid state  $^{13}\text{C}$ -NMR spectrum of **ACP3**

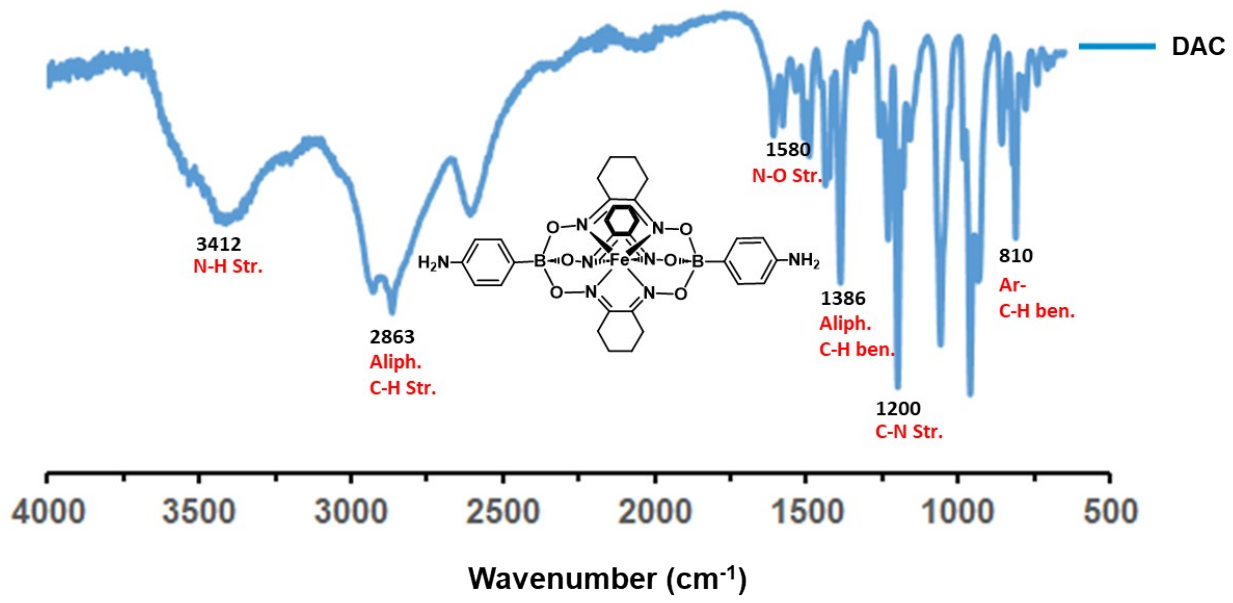

**Figure S5** FTIR spectrum of **DAC**



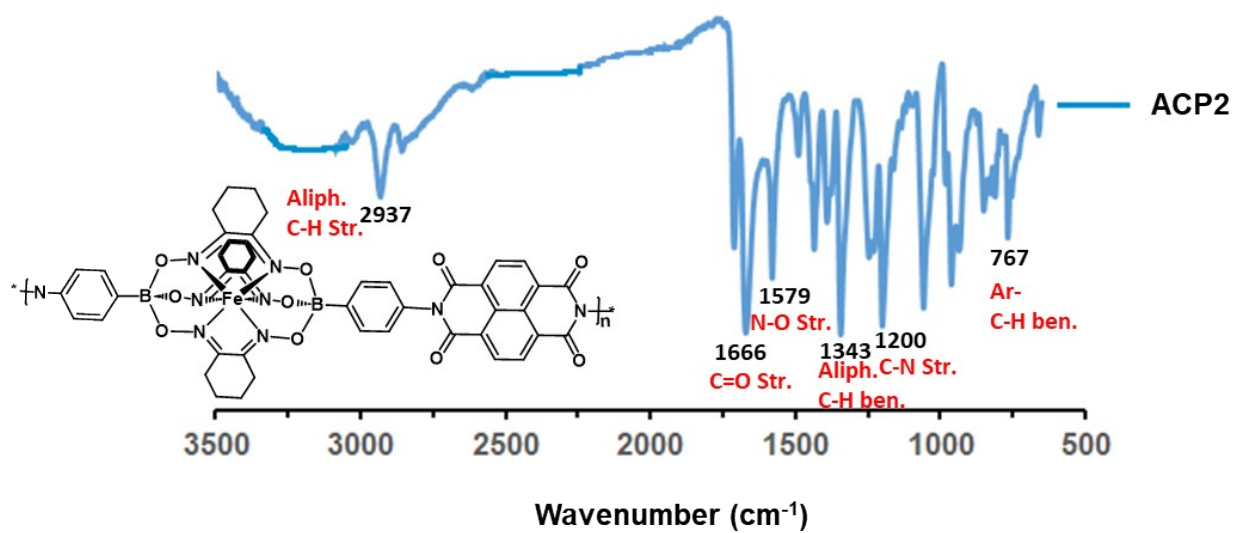

Figure S6 FTIR spectrum of ACP2

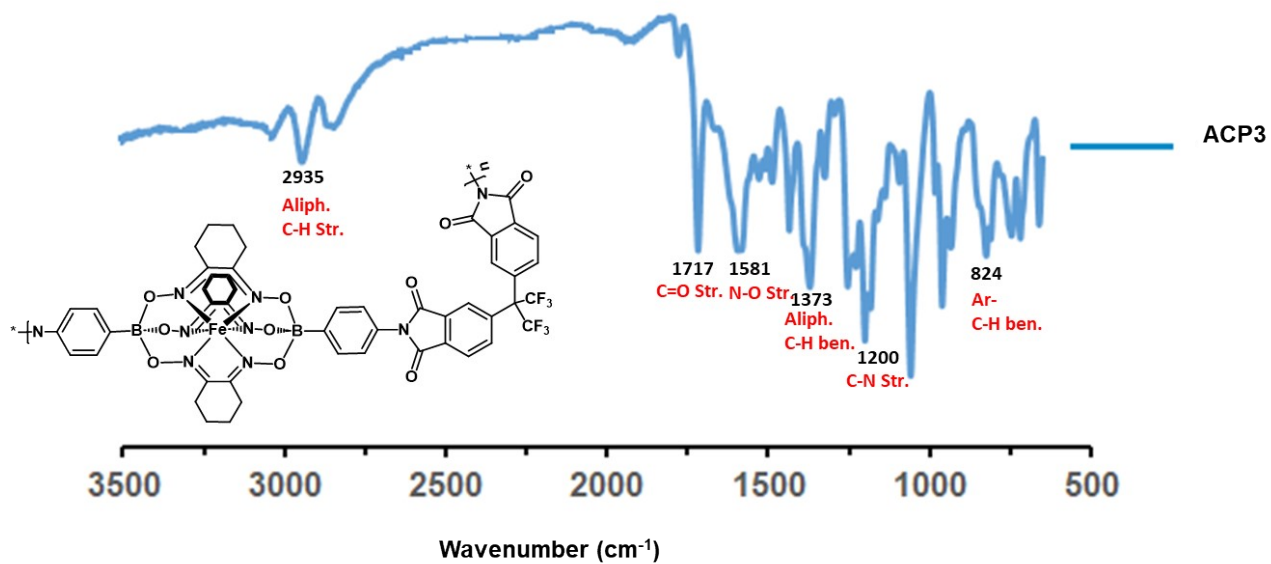

Figure S7 FTIR spectrum of ACP3

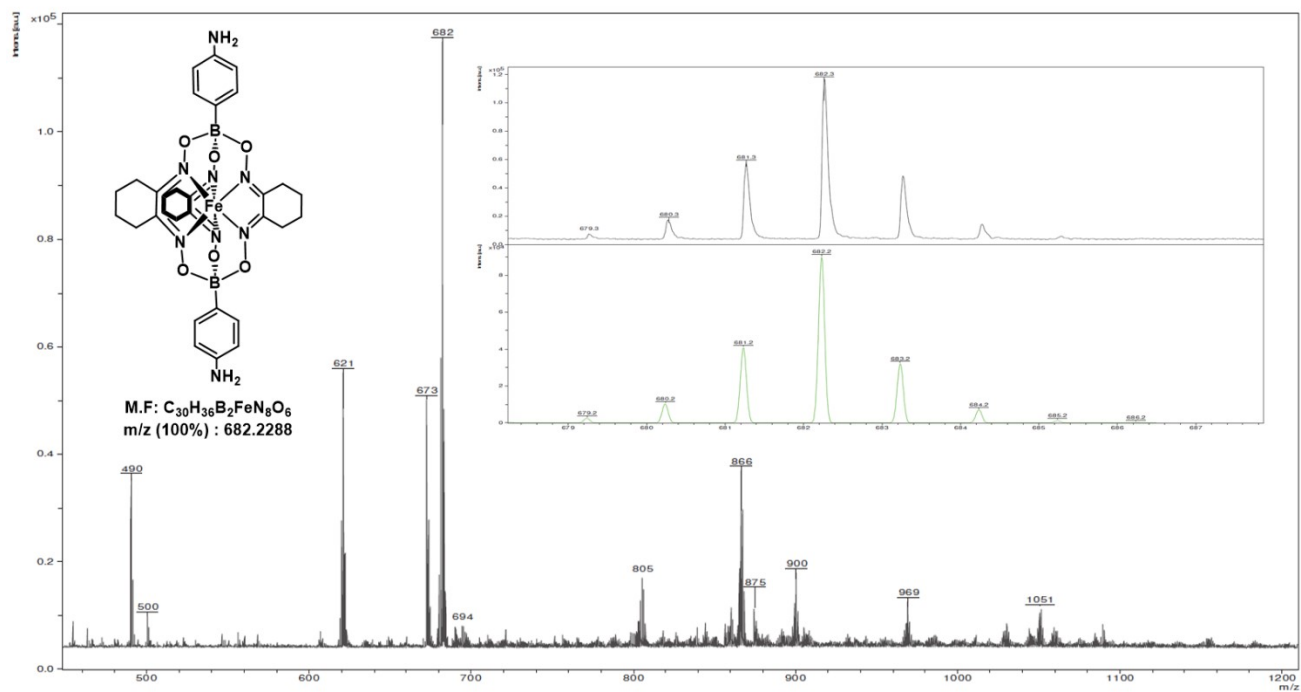

**Figure S8** EI-HRMS spectrum of **DAC**

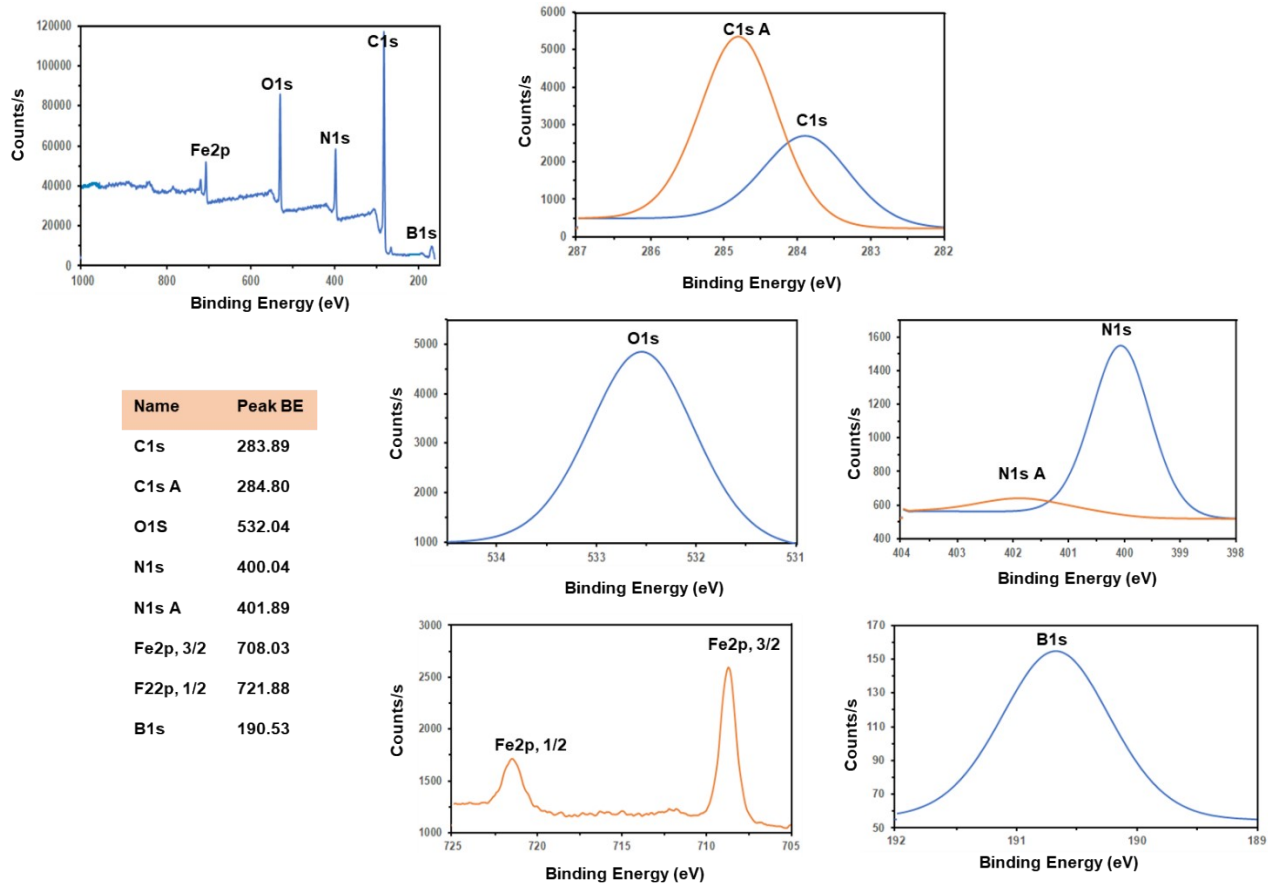

Figure S9 XPS spectrum of DAC

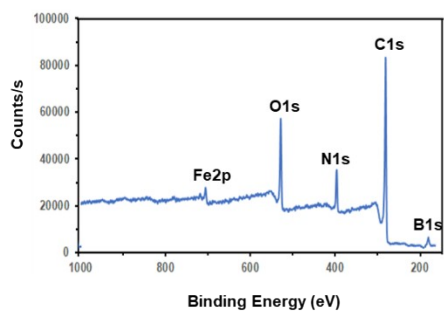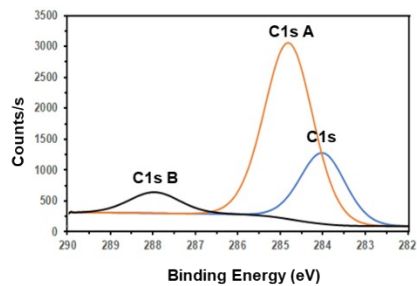

| Name      | Peak BE |
|-----------|---------|
| C1s       | 284.00  |
| C1s A     | 284.80  |
| C1s B     | 287.96  |
| O1s       | 530.82  |
| O1s A     | 531.83  |
| N1s       | 399.93  |
| N1s A     | 401.47  |
| Fe2p, 3/2 | 708.59  |
| F22p, 1/2 | 721.88  |
| B1s       | 190.48  |

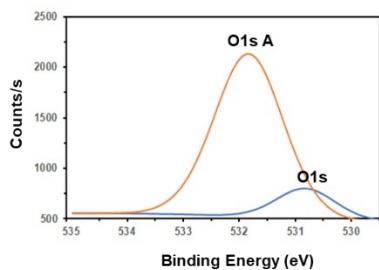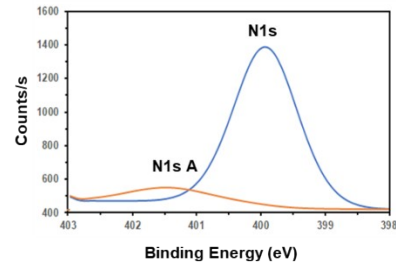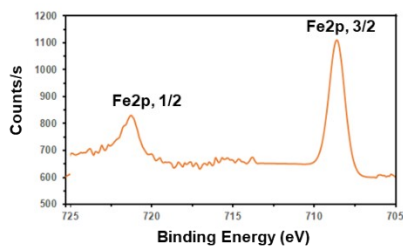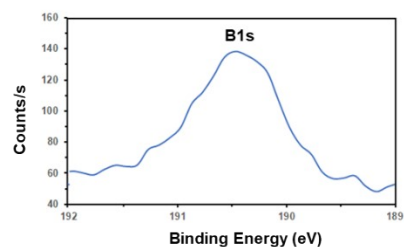

Figure S10 XPS spectrum of ACP2

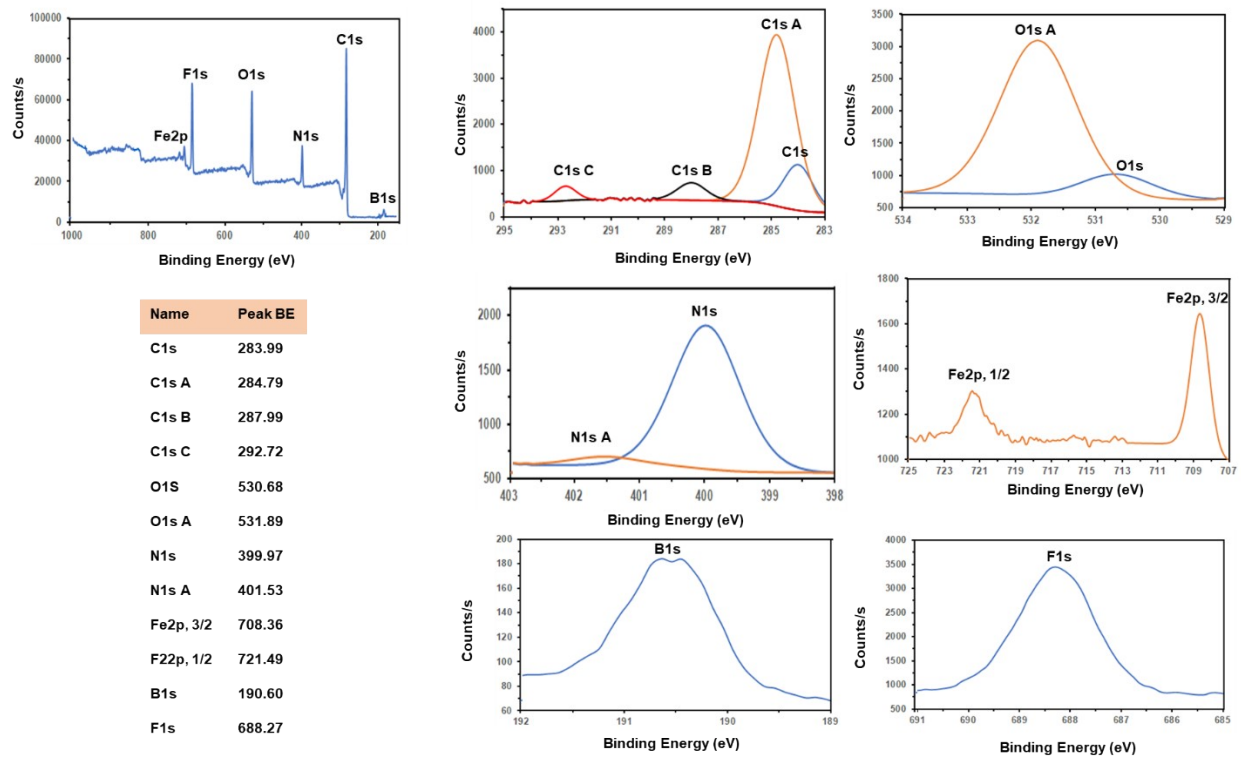

Figure S11 XPS spectrum of ACP3

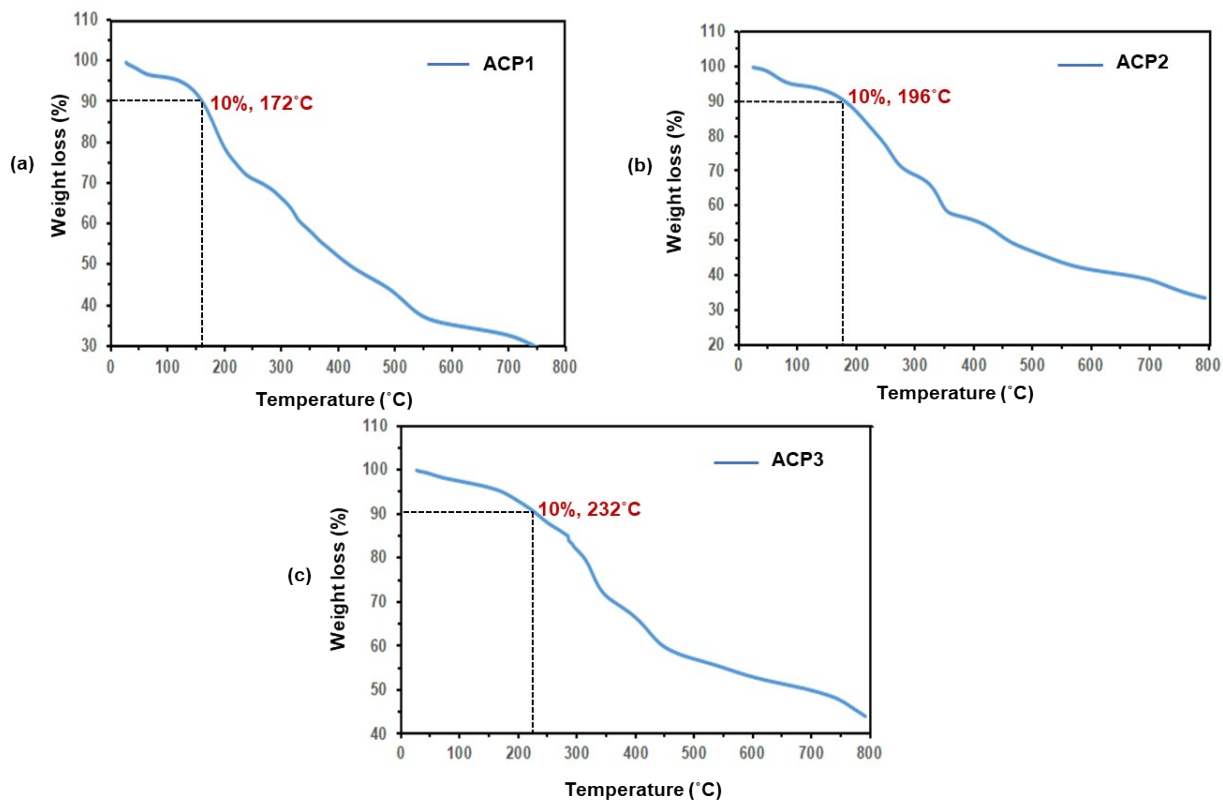

**Figure S12** TGA thermograms of (a) ACP1, (b) ACP2 and (c) ACP3,  $T_d$  represents the temperature of 10% weight loss

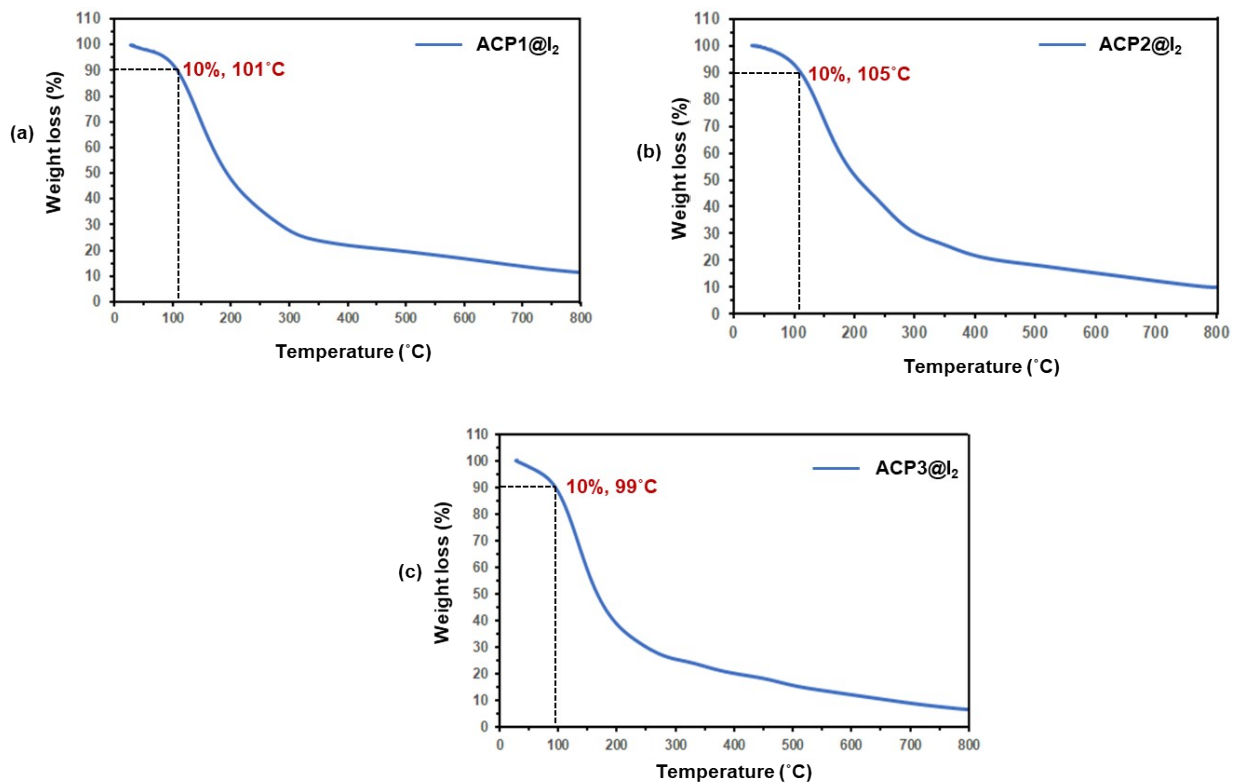

Figure S13 TGA thermograms of (a) ACP1@I<sub>2</sub>, (b) ACP2@I<sub>2</sub> and (c) ACP3@I<sub>2</sub>



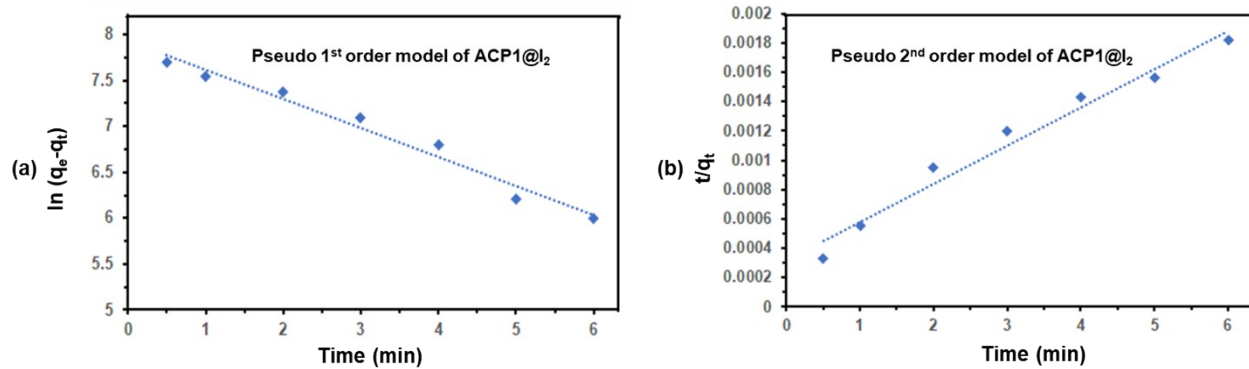

Figure S14 Pseudo-first-order (a) and pseudo-second-order (b) models of ACP1@I<sub>2</sub>

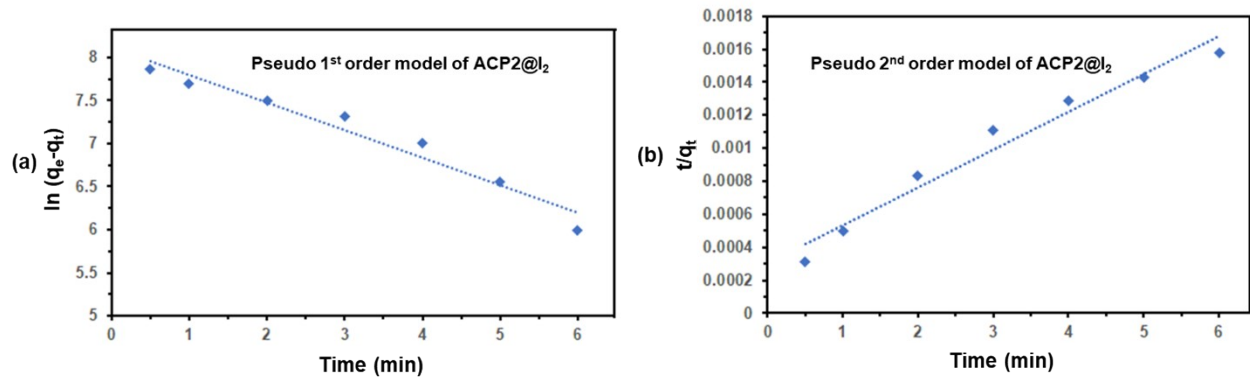

Figure S15 Pseudo-first-order (a) and pseudo-second-order (b) models of ACP2@I<sub>2</sub>

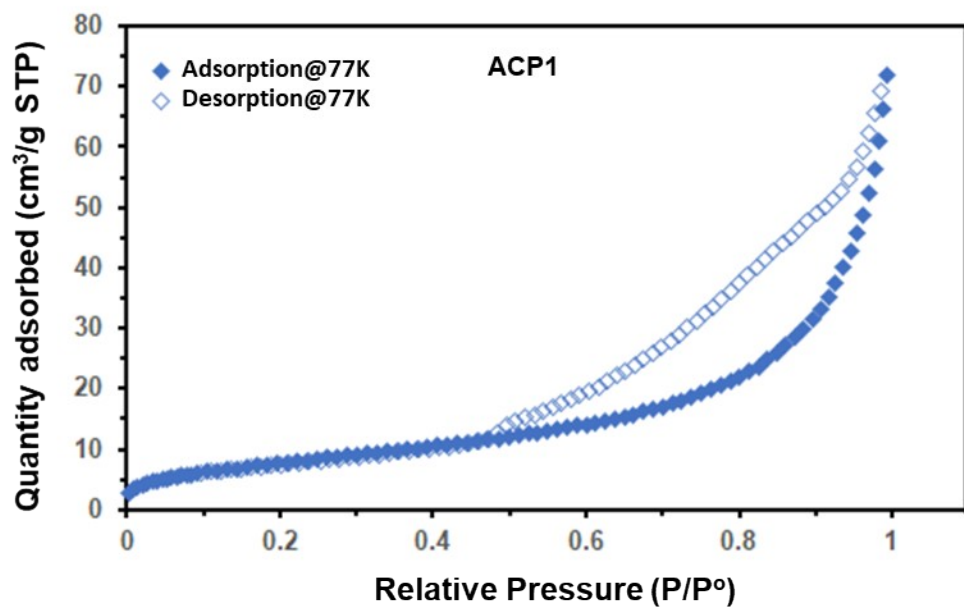

**Figure S16** Nitrogen (N<sub>2</sub>) adsorption and desorption isotherms for **ACP1** recorded at 77 K

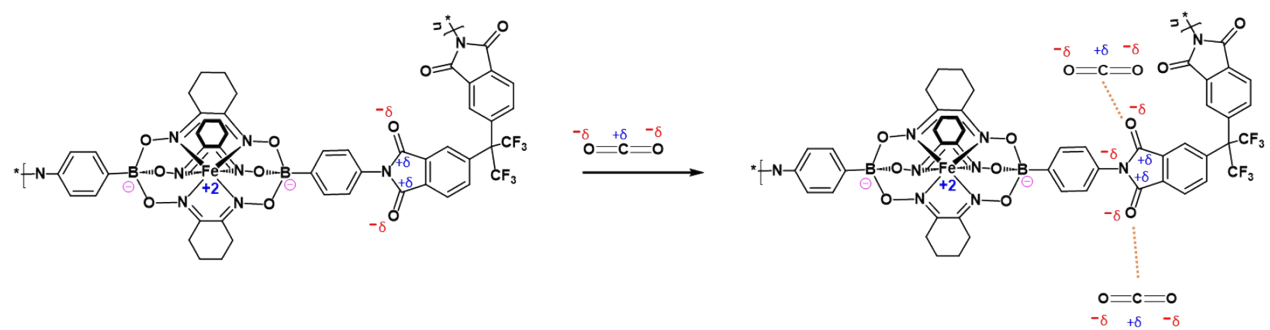

**Figure S17** Suggested CO<sub>2</sub> adsorption mechanism by **ACP3**

| Entry | Adsorbent                                             | CO <sub>2</sub> (mg g <sup>-1</sup> ) | Reference                                                      |
|-------|-------------------------------------------------------|---------------------------------------|----------------------------------------------------------------|
| 1     | Iron(II) clathrochelate based copolymers              | 43                                    | This work                                                      |
| 2     | Si-MCM-41                                             | 27.3                                  | Xu, X, 2003, Microporous and Mesoporous Materials <sup>1</sup> |
| 3     | Nanoporous triptycene based network polyamides (TBP3) | 38                                    | Bera, R, 2017, Polymer <sup>2</sup>                            |
| 4     | CHIT-HTC-12                                           | 4.4                                   | Chagas, J, 2020, ACS Omega <sup>3</sup>                        |

**Table S1** Comparison of CO<sub>2</sub> capture capacity with different adsorbents

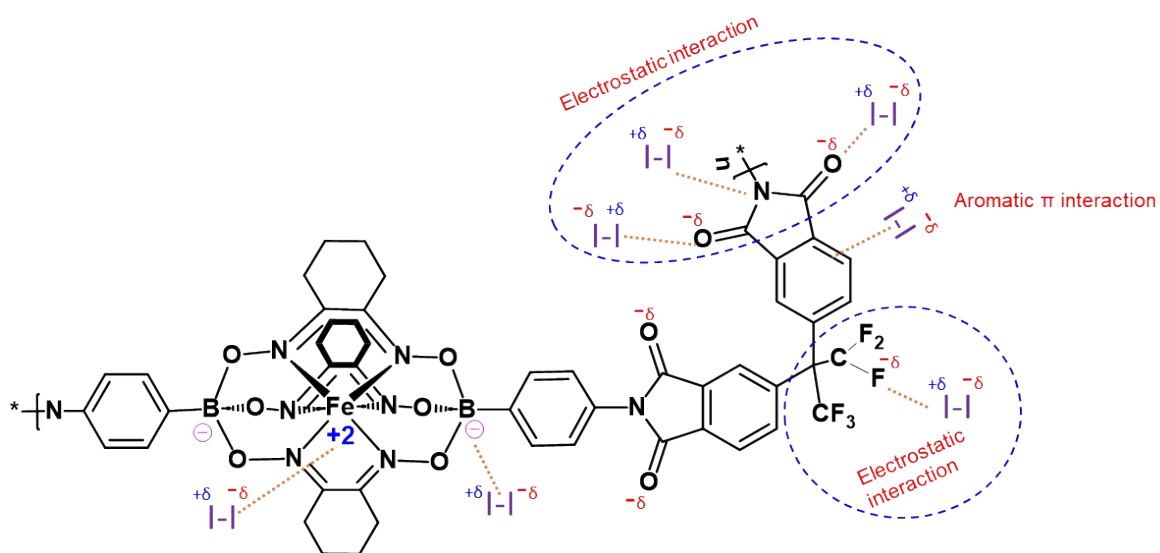

**Figure S18** Suggested  $I_2$  adsorption mechanism of by **ACP3**

| Entry | Adsorbent                                                             | I <sub>2</sub> (wt.%) | Reference                                                                  |
|-------|-----------------------------------------------------------------------|-----------------------|----------------------------------------------------------------------------|
| 1     | Iron(II) clathrochelate based copolymers                              | 680                   | This work                                                                  |
| 2     | Hydroxyl-functionalized hyper-crosslinked polymers                    | 673                   | Wang, J , 2024, iScience <sup>4</sup>                                      |
| 3     | Conjugated Microporous Polymers Based on Octet and Tetratopic Linkers | 367                   | Luo, S, 2023, ACS Applied Materials & Interfaces <sup>5</sup>              |
| 4     | POP-T                                                                 | 394                   | Tian, P, 2022, Molecules <sup>6</sup>                                      |
| 5     | Metal–Organic Framework Nanosheets                                    | 351                   | Yu, C.-X, 2022, Inorganic Chemistry <sup>7</sup>                           |
| 6     | Triazole-linked porous cage polymers                                  | 402                   | Begar, F, 2024, ACS Applied Polymer Materials <sup>8</sup>                 |
| 7     | Aniline-based hypercrosslinked polymers                               | 596                   | Liu, B, 2023, International Journal of Molecular Sciences <sup>9</sup>     |
| 8     | Triptycene based covalent organic polymers                            | 486                   | Hassan, A, 2022, Chemical Engineering Journal <sup>10</sup>                |
| 9     | TAPB-QOT COP                                                          | 464                   | Yildirim, O, 2023, ACS Appl Mater Interfaces <sup>11</sup>                 |
| 10    | Triazine-based covalent organic polymers (POPs-1)                     | 441                   | Xiong, S, 2023, Journal of Materials Research and Technology <sup>12</sup> |

**Table S2** Comparison of I<sub>2</sub> capture capacity with different adsorbents

## References

- (1) Xu, X.; Song, C.; Andrésen, J. M.; Miller, B. G.; Scaroni, A. W. Preparation and Characterization of Novel CO<sub>2</sub> “Molecular Basket” Adsorbents Based on Polymer-Modified Mesoporous Molecular Sieve MCM-41. *Microporous and Mesoporous Materials* 2003, 62 (1), 29-45. DOI: 10.1016/S1387-1811(03)00388-3.
- (2) Bera, R.; Mondal, S.; Das, N. Nanoporous Triptycene Based Network Polyamides (TBPs) for Selective CO<sub>2</sub> Uptake. *Polymer* 2017, 111, 275-284. DOI: 10.1016/j.polymer.2017.01.056.
- (3) Chagas, J. A. O.; Crispim, G. O.; Pinto, B. P.; San Gil, R. A. S.; Mota, C. J. A. Synthesis, Characterization, and CO<sub>2</sub> Uptake of Adsorbents Prepared by Hydrothermal Carbonization of Chitosan. *ACS Omega* 2020, 5 (45), 29520-29529. DOI: 10.1021/acsomega.0c04470.
- (4) Wang, J.; Wu, T.; Wang, X.; Chen, J.; Fan, M.; Shi, Z.; Liu, J.; Xu, L.; Zang, Y. Construction of Hydroxyl-Functionalized Hyper-Crosslinked Networks from Polyimide for Highly Efficient Iodine Adsorption. *iScience* 2024, 27 (2), 108993. DOI: 10.1016/j.isci.2024.108993.
- (5) Luo, S.; Yan, Q.; Wang, S.; Hu, H.; Xiao, S.; Su, X.; Xu, H.; Gao, Y. Conjugated Microporous Polymers Based on Octet and Tetratopic Linkers for Efficient Iodine Capture. *ACS Applied Materials & Interfaces* 2023, 15 (39), 46408-46416. DOI: 10.1021/acscami.3c10786.
- (6) Tian, P.; Ai, Z.; Hu, H.; Wang, M.; Li, Y.; Gao, X.; Qian, J.; Su, X.; Xiao, S.; Xu, H.; et al. Synthesis of Electron-Rich Porous Organic Polymers via Schiff-Base Chemistry for Efficient Iodine Capture. *Molecules*, 2022, 27(16), 5161. DOI: 10.3390/molecules27165161
- (7) Yu, C.-X.; Li, X.-J.; Zong, J.-S.; You, D.-J.; Liang, A.-P.; Zhou, Y.-L.; Li, X.-Q.; Liu, L.-L. Fabrication of Protonated Two-Dimensional Metal–Organic Framework Nanosheets for Highly



Efficient Iodine Capture from Water. *Inorganic Chemistry* 2022, 61 (35), 13883-13892. DOI: 10.1021/acs.inorgchem.2c01886.

(8) Begar, F.; Erdogmus, M.; Gecalp, Y.; Canakci, U. C.; Buyukcakir, O. Synthesis of Triazole-Linked Porous Cage Polymers: Modulating Cage Size for Tailored Iodine Adsorption. *ACS Applied Polymer Materials* 2024. DOI: 10.1021/acsapm.4c00560.

(9) Liu, B.; Mao, C.; Zhou, Z.; Wang, Q.; Zhou, X.; Liao, Z.; Deng, R.; Liu, D.; Beiyuan, J.; Lv, D.; et al. Two Facile Aniline-Based Hypercrosslinked Polymer Adsorbents for Highly Efficient Iodine Capture and Removal. *International Journal of Molecular Sciences*, 2023, 24 (1), 370 DOI: 10.3390/ijms24010370.

(10) Hassan, A.; Alam, A.; Ansari, M.; Das, N. Hydroxy Functionalized Triptycene Based Covalent Organic Polymers for Ultra-high Radioactive Iodine Uptake. *Chemical Engineering Journal* 2022, 427, 130950. DOI: 10.1016/j.cej.2021.130950

(11) Yildirim, O.; Tsaturyan, A.; Damin, A.; Nejrotti, S.; Crocellà, V.; Gallo, A.; Chierotti, M. R.; Bonomo, M.; Barolo, C. Quinoid-Thiophene-Based Covalent Organic Polymers for High Iodine Uptake: When Rational Chemical Design Counterbalances the Low Surface Area and Pore Volume. *ACS Appl Mater Interfaces* 2023, 15 (12), 15819-15831. DOI: 10.1021/acsami.2c20853.

(12) Xiong, S.; Huang, H.; Tang, T.; Cao, X.; Zhao, H.; Li, G.; Liu, H.; Zhang, W.; Liu, Q. Creating high-affinity binding sites for efficient CO<sub>2</sub> and iodine vapor uptake through direct synthesis of novel triazine-based covalent organic polymers. *Journal of Materials Research and Technology* 2023, 27, 5629-5638. DOI: 10.1016/j.jmrt.2023.10.309
